# Supplementary material for: High-throughput barcoding of nanoparticles identifies cationic, degradable lipid-like materials for mRNA delivery to the lungs in female preclinical models
Source: PubMed Central journal article supplement (PMC10904786; doi:10.1038/s41467-024-45422-9), 2024-02-29
Supplement: 41467_2024_45422_MOESM1_ESM.pdf [file 41467_2024_45422_MOESM1_ESM.pdf]

Supplementary Information for

**High-Throughput Barcoding of Nanoparticles Identifies Cationic, Degradable Lipid-Like Materials for mRNA Delivery to the Lungs in Female Preclinical Models**

*Xue, et al.*

**This PDF file includes:**

Figures (S1-S29)

Tables (S1-S3)

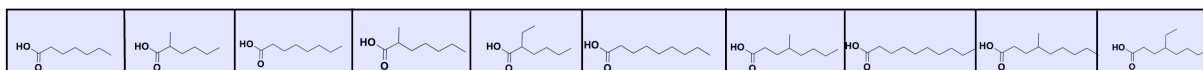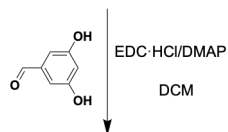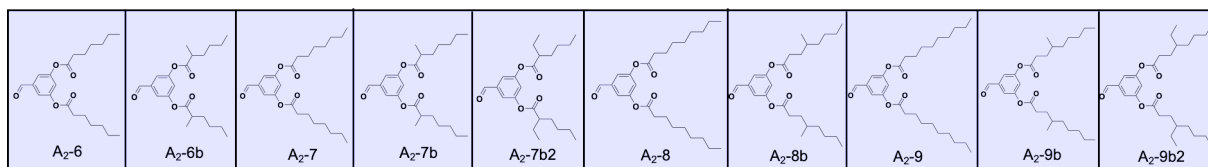

Supplementary Figure 1. Synthetic route of aldehyde di-degradable tails used in this study.

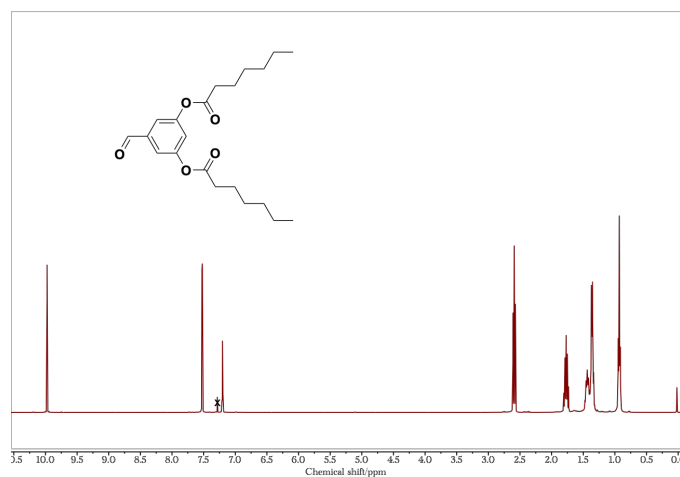

Supplementary Figure 2. <sup>1</sup>H NMR spectrum of A<sub>2</sub>-6.

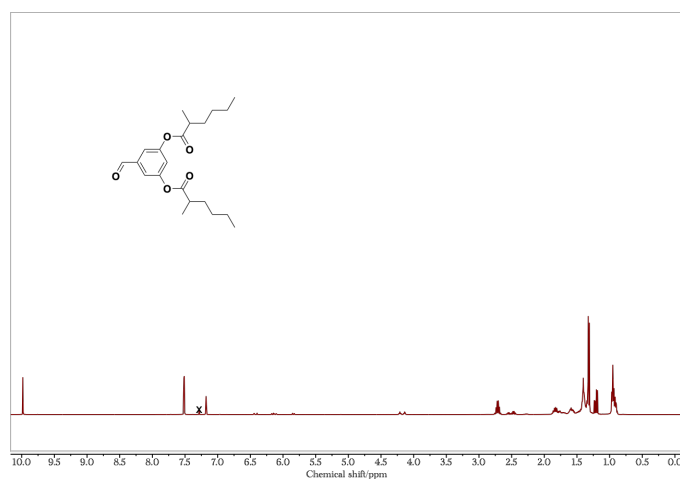

Supplementary Figure 3. <sup>1</sup>H NMR spectrum of A<sub>2</sub>-6b.

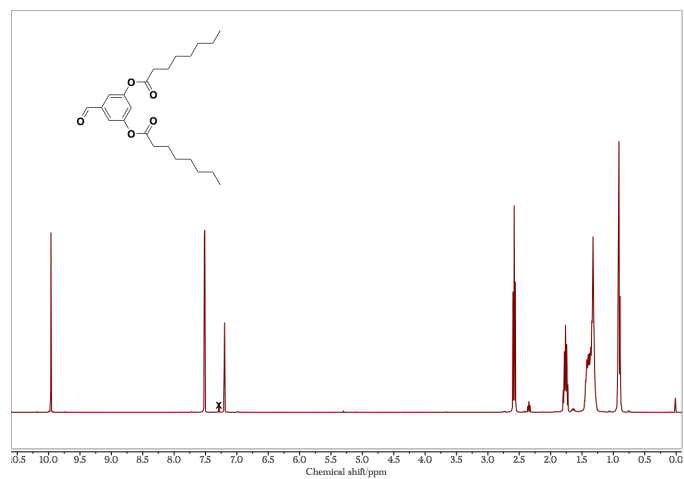

Supplementary Figure 4. <sup>1</sup>H NMR spectrum of A<sub>2</sub>-7.

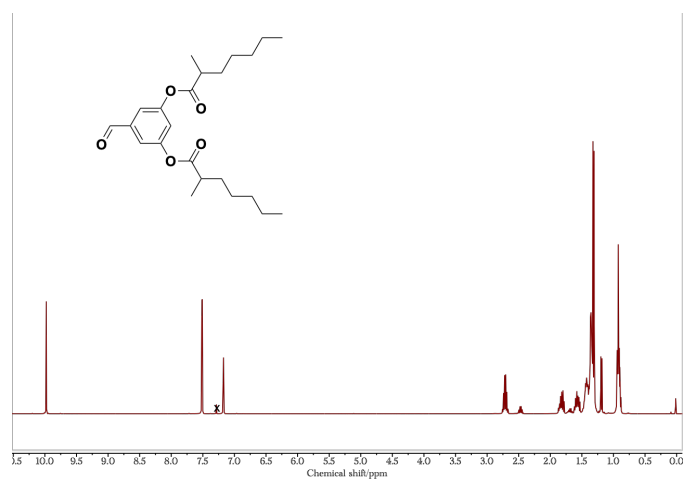

Supplementary Figure 5. <sup>1</sup>H NMR spectrum of A<sub>2</sub>-7b.

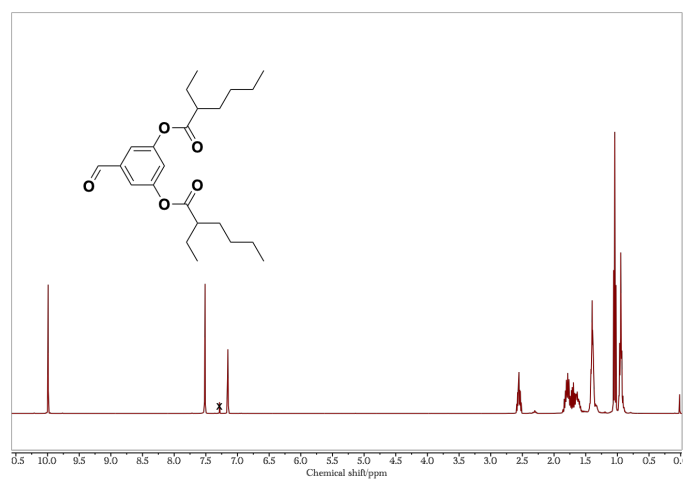

Supplementary Figure 6. <sup>1</sup>H NMR spectrum of A<sub>2</sub>-7b2.

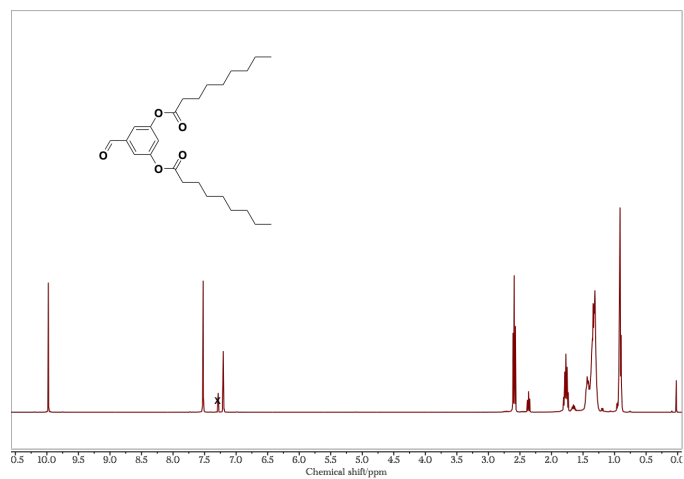

Supplementary Figure 7. <sup>1</sup>H NMR spectrum of A<sub>2</sub>-8.

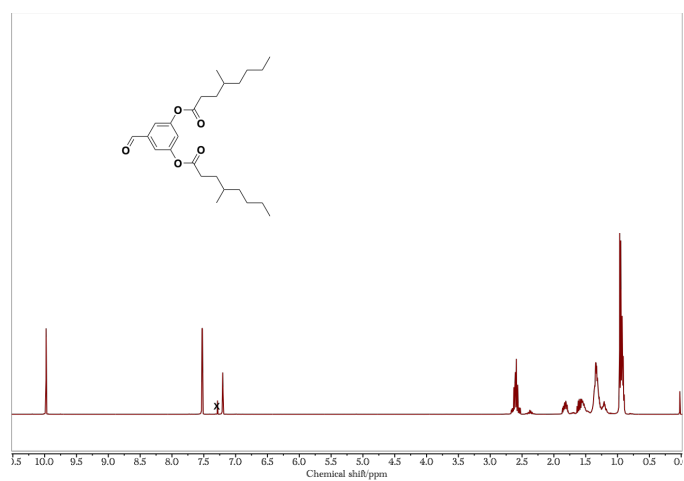

Supplementary Figure 8. <sup>1</sup>H NMR spectrum of A<sub>2</sub>-8b.

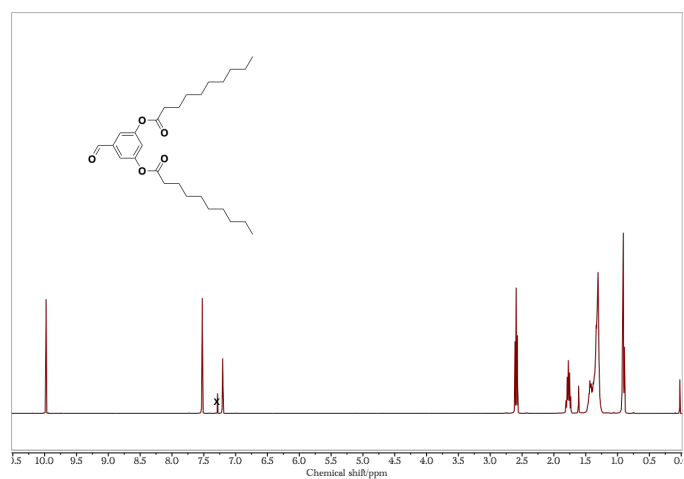

Supplementary Figure 9. <sup>1</sup>H NMR spectrum of A<sub>2</sub>-9.

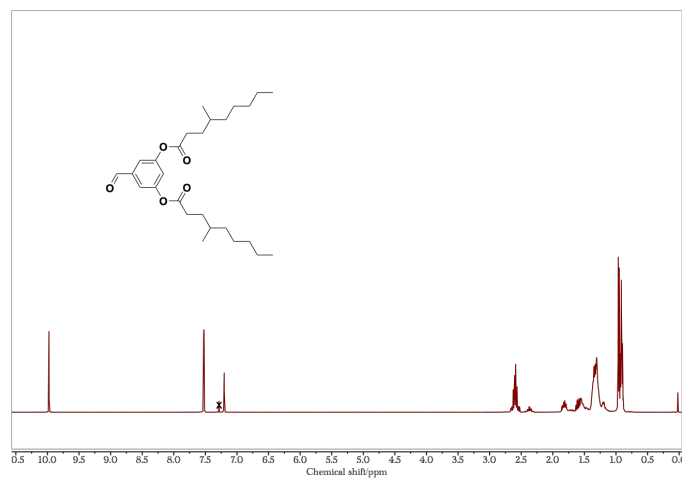

Supplementary Figure 10.  $^1\text{H}$  NMR spectrum of A<sub>2</sub>-9b.

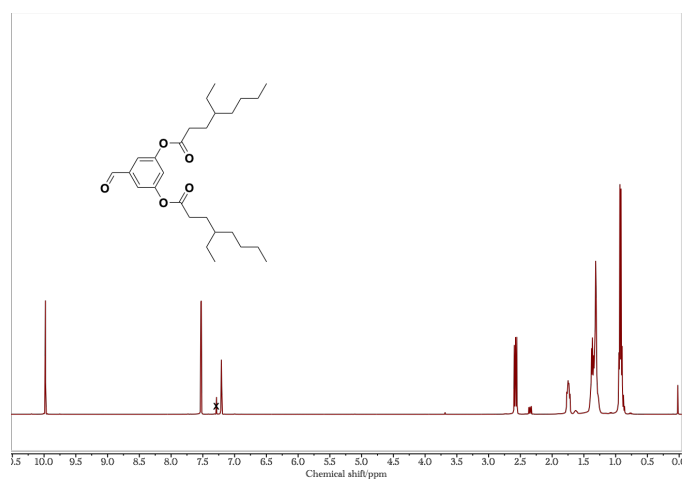

Supplementary Figure 11.  $^1\text{H}$  NMR spectrum of A<sub>2</sub>-9b2.

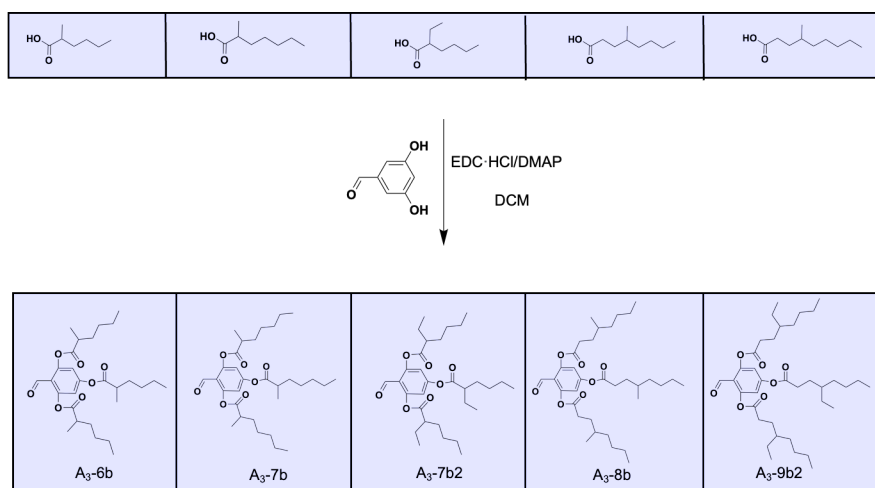

Supplementary Figure 12. Synthetic route of aldehyde tri-degradable tails used in this study.

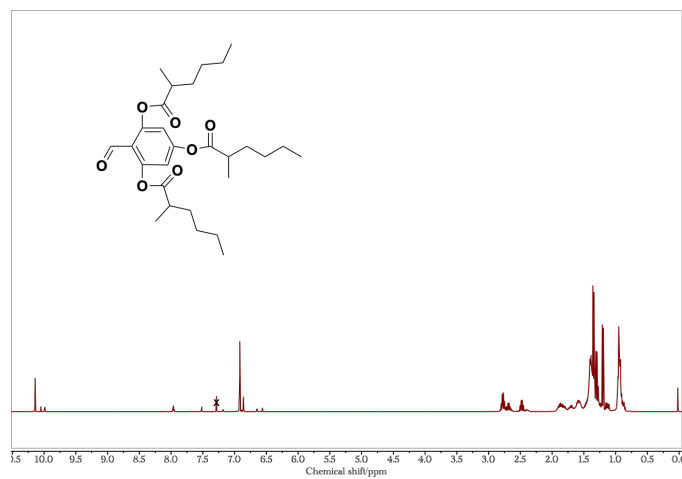

Supplementary Figure 13. <sup>1</sup>H NMR spectrum of A<sub>3</sub>-6b.

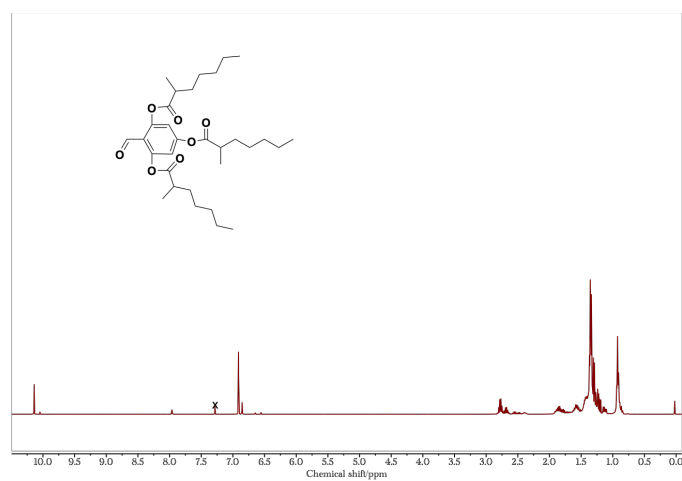

Supplementary Figure 14. <sup>1</sup>H NMR spectrum of A<sub>3</sub>-7b.

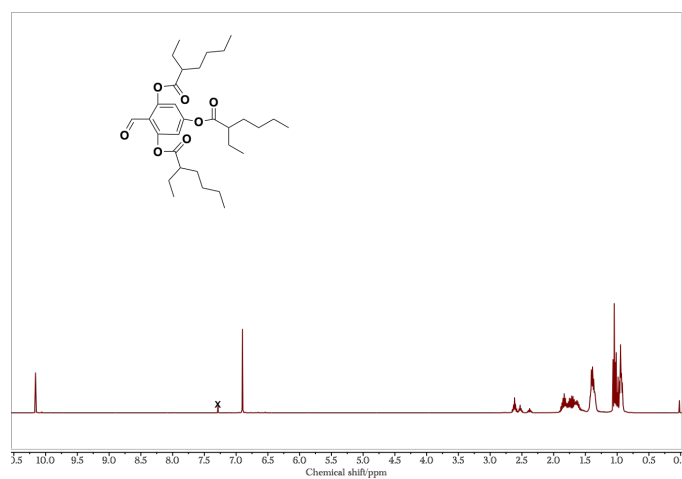

Supplementary Figure 15. <sup>1</sup>H NMR spectrum of A<sub>3</sub>-7b2.

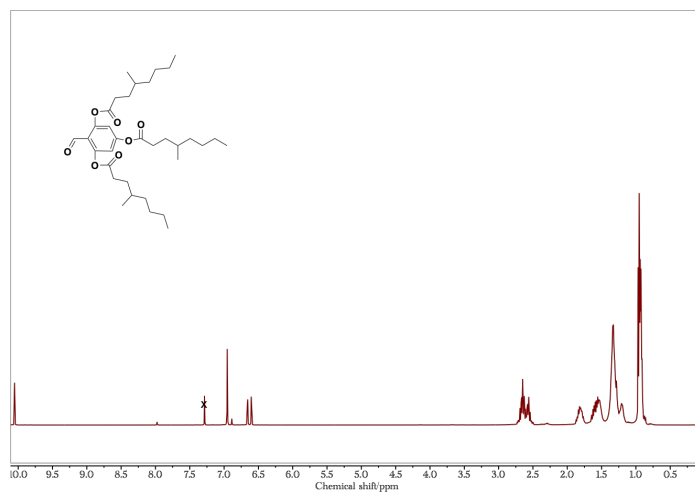

Supplementary Figure 16. <sup>1</sup>H NMR spectrum of A<sub>3</sub>-8b.

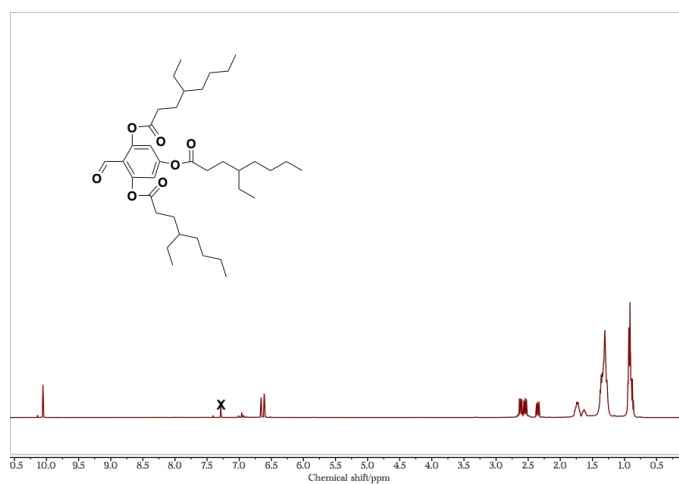

Supplementary Figure 17. <sup>1</sup>H NMR spectrum of A<sub>3</sub>-9b2.

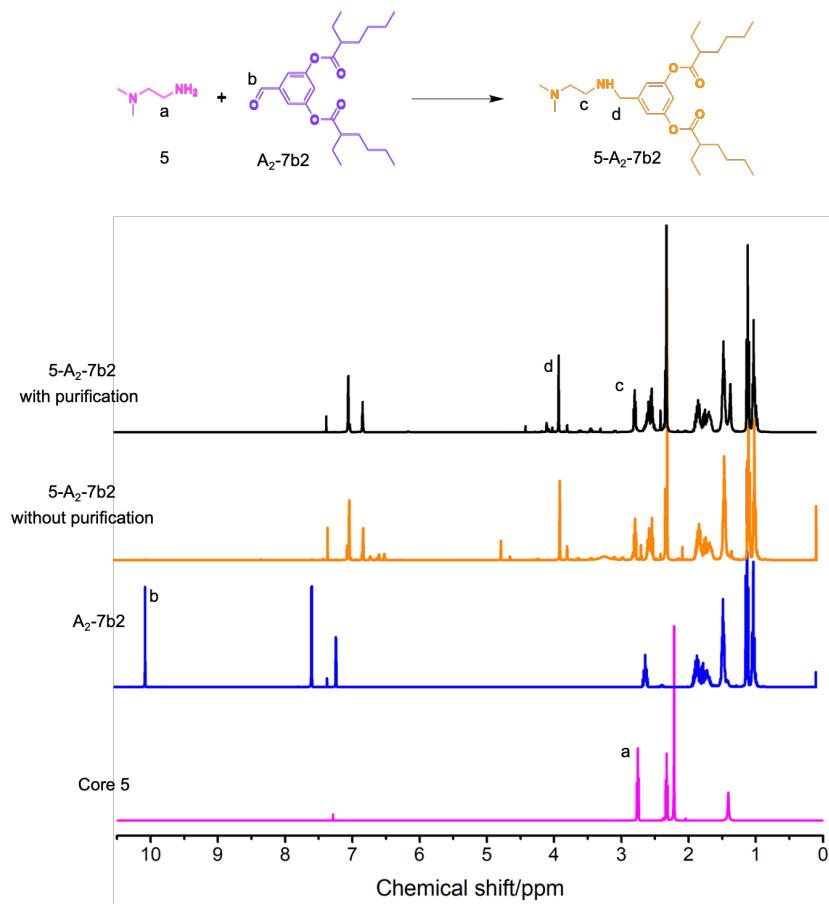

Supplementary Figure 18. Model reaction between amine head 5 and A<sub>2</sub>-7b2 and their respective <sup>1</sup>H NMR characterizations.

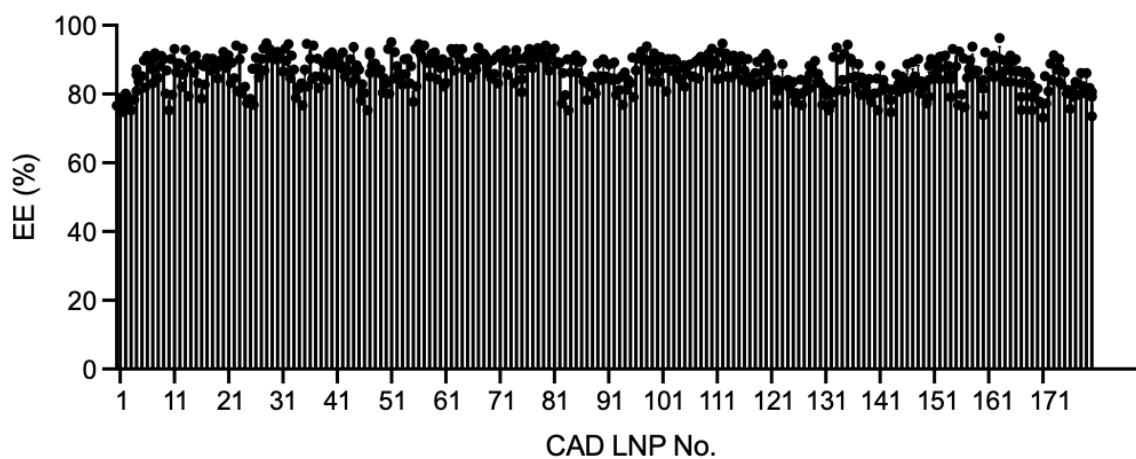

Supplementary Figure 19. mRNA encapsulation efficiency of 180 CAD-LNPs used for *in vitro* screening on HeLa cell (n = 3 replicates). Data are represented as mean ± s.e.m. Source Data are provided in the Source Data File.



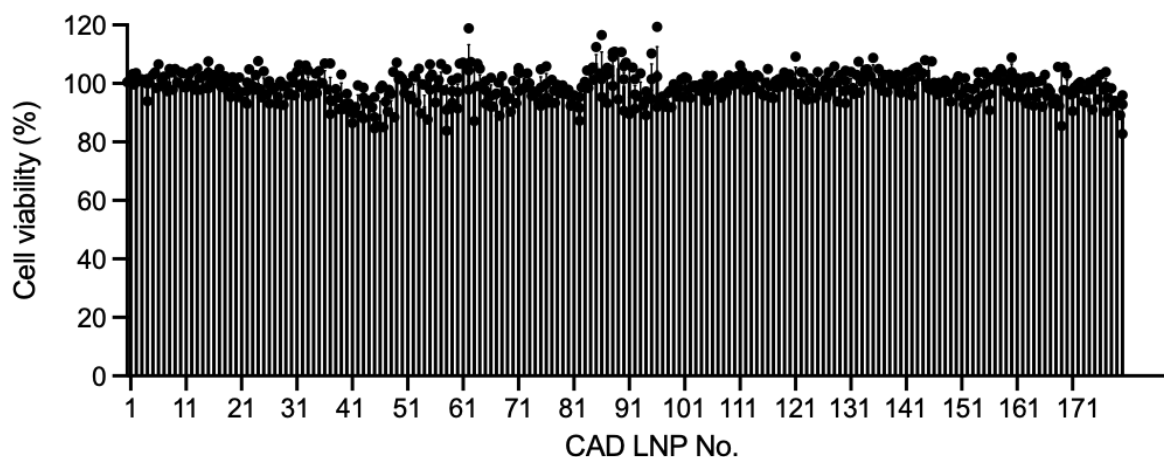

Supplementary Figure 20. Cell viability after 24 h transfection of 180 CAD LNPs in HeLa cells. 5000 cells were plated per well and treated by 10 ng mRNA (n = 3 replicates). Data are represented as mean  $\pm$  s.e.m. Source Data are provided in the Source Data File.

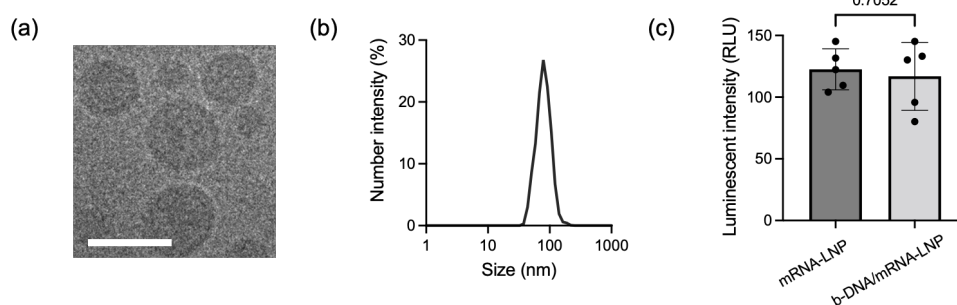

Supplementary Figure 21. (a) Structural morphology of 3-A<sub>2</sub>-7b LNP encapsulating b-DNA/FLuc (with a weight ratio of 10:1) as visualized by Cryo-TEM. Scale bar: 100 nm. (b) Distribution of hydrodynamic diameter of 3-A<sub>2</sub>-7b LNP encapsulating b-DNA/FLuc mRNA (with a weight ratio of 10:1) acquired by DLS. (c) Luciferase expression following treatment of HeLa cells with 3-A<sub>2</sub>-7b LNP encapsulating FLuc mRNA and b-DNA/FLuc mRNA (10 ng luciferase mRNA, n = 5 replicates). Statistical significance in (c) was calculated using Student's t test with unpaired design.  $P > 0.05$ , not significant (ns). Source Data are provided in the Source Data File.

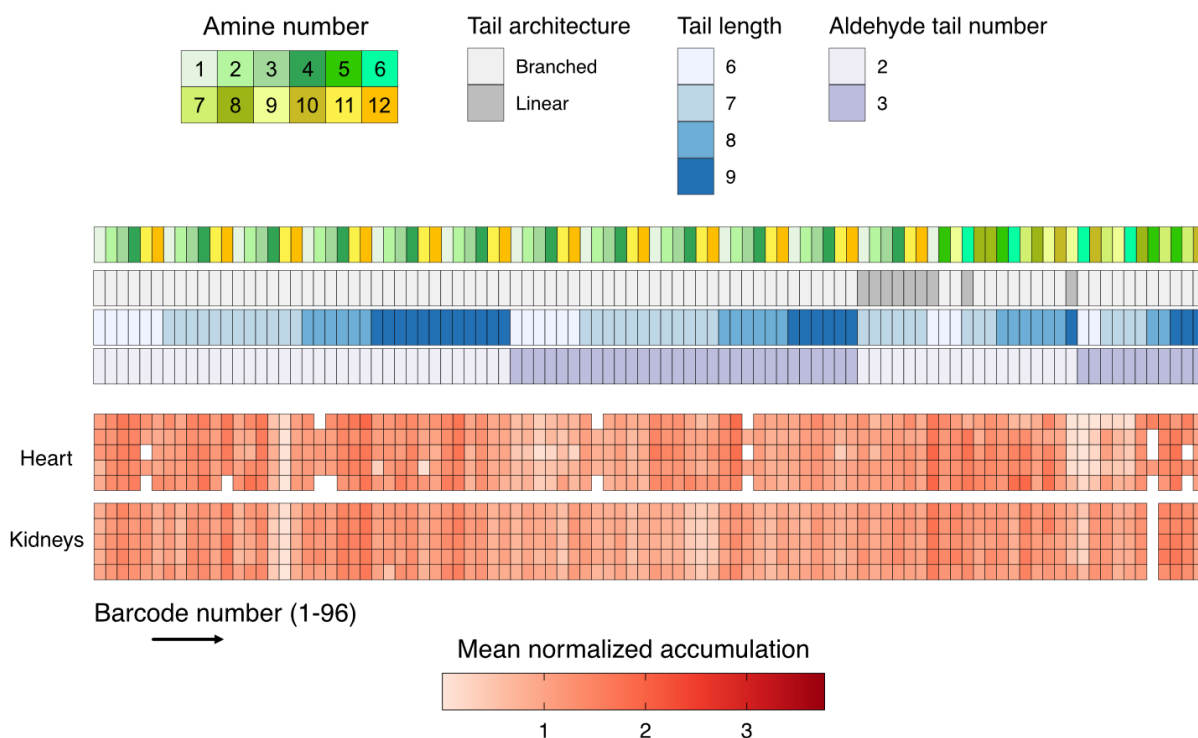

Supplementary Figure 22. Heatmap demonstrates the accumulation of CAD LNPs in the heart and kidneys. Dark clusters represent higher accumulation of a b-DNA in a specific tissue sample. Structure details of CAD lipids in each LNP formulation is described above the heatmap.  $n = 5$  mice.

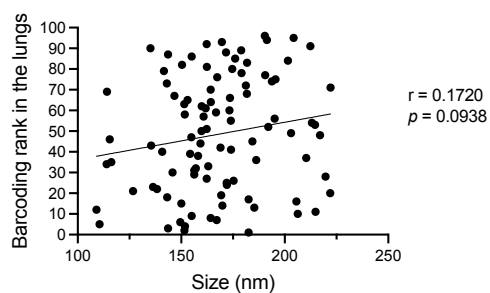

Supplementary Figure 23. Correlation of LNPs size and their respective lung delivery barcoding rank number. Source Data are provided in the Source Data File.

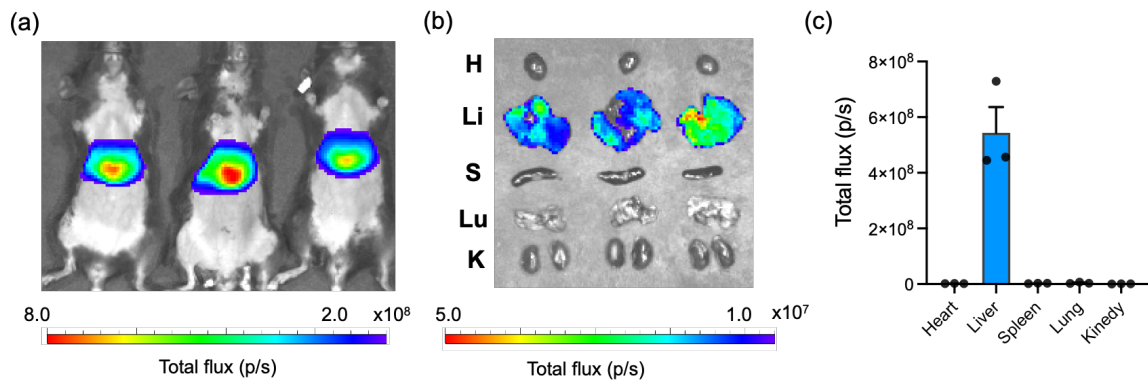

Supplementary Figure 24. *Ex vivo* luminescence intensity of organs in mice after administration with LNP-CAD20 delivering FLuc-mRNA at a dosage of 0.25 mg/kg. (a) Luminescence imaging of the body after LNP treatment. (b) Luminescence imaging of organs from (a). (c) Luminescence quantification of the organs from (b). H: heart; Li: liver; S: spleen; Lu: lung; K: Kidney. Data are represented as mean  $\pm$  s.e.m. (n =3 mice). Source Data are provided in the Source Data File.

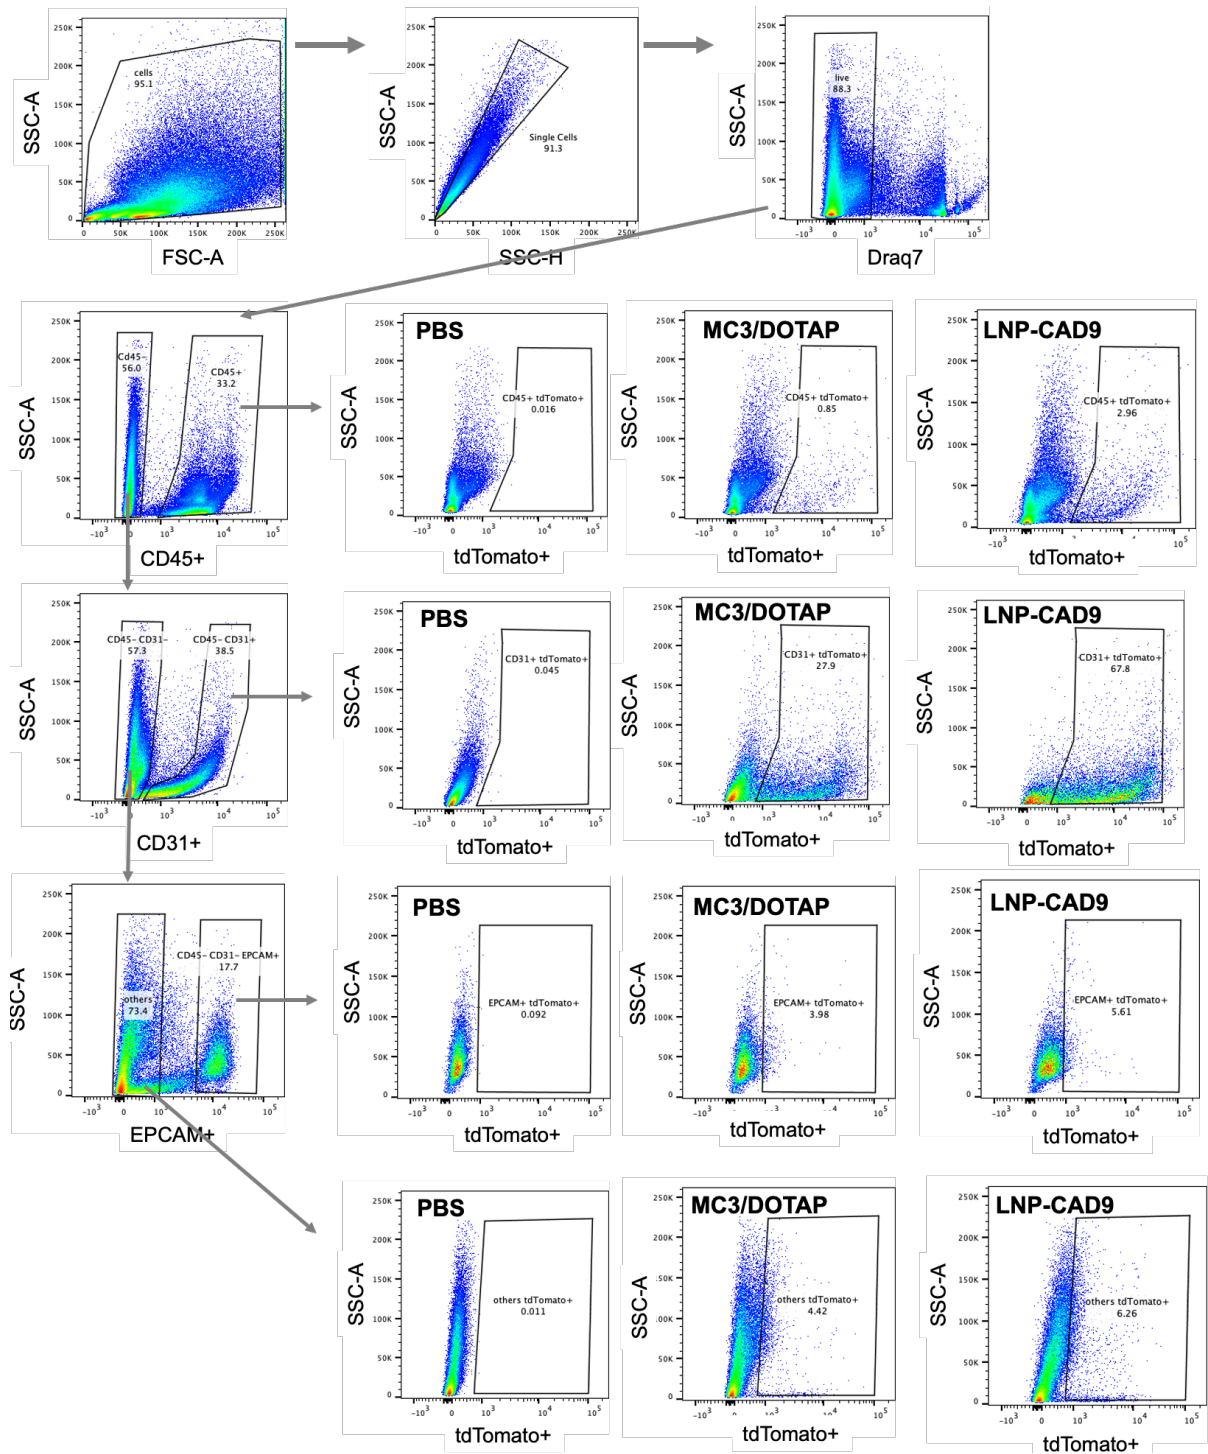

Supplementary Figure 25. Representative gating strategy of diverse tdTomato<sup>+</sup> cells in the lungs. Draq7 was used for distinguish live and dead cells. CD45<sup>+</sup> antibody was used to stain immune cells, then CD45<sup>-</sup>/CD31<sup>+</sup> was used for lung endothelial cells, CD45<sup>-</sup>/CD31<sup>-</sup>/EPCAM<sup>+</sup> was used for lung epithelial cells, and the rest CD45<sup>-</sup>/CD31<sup>-</sup>/EPCAM<sup>-</sup> was stained as others. Ai14 mice was administered with PBS or Cre mRNA LNP (MC3/DOTAP LNP or LNP-CAD9) at a total mRNA dosage of 0.3 mg/kg. The mice were necropsied 3 days post-injection for flow studies. Data are represented as mean  $\pm$  s.e.m. (n = 4 mice).

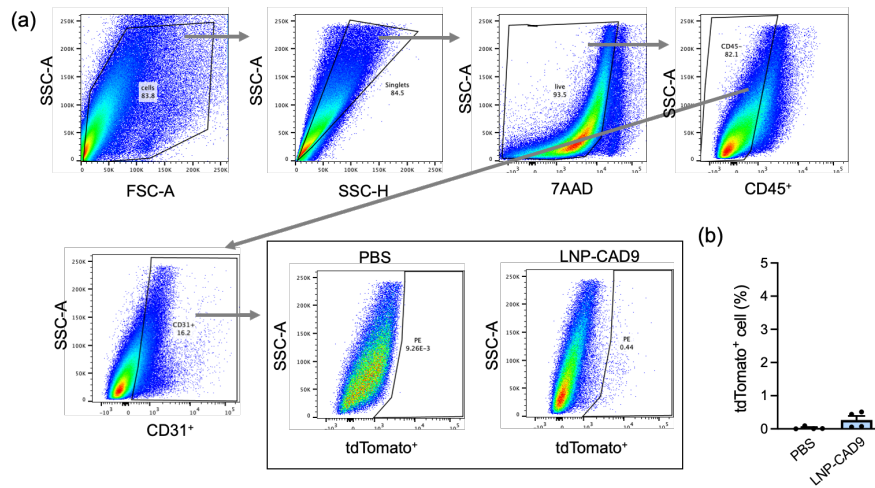

Supplementary Figure 26. (a) Representative gating strategy for tdTomato<sup>+</sup> endothelial cells in the liver. 7AAD was used to distinguish live and dead cells. CD45<sup>+</sup> antibody was used to stain immune cells, then CD45/CD31<sup>+</sup> was used to identify liver endothelial cells. Ai14 mice was administered with PBS or LNP-CAD9 delivering Cre mRNA at a total dosage of 0.3 mg kg<sup>-1</sup>. The mice were necropsied 3 days post-injection for flow cytometry studies. (b) Proportion of tdTomato<sup>+</sup> endothelial cells in the liver assessed by flow cytometry. Data are presented as  $\pm$  s.e.m. (n = 4 mice). Source Data are provided in the Source Data File.

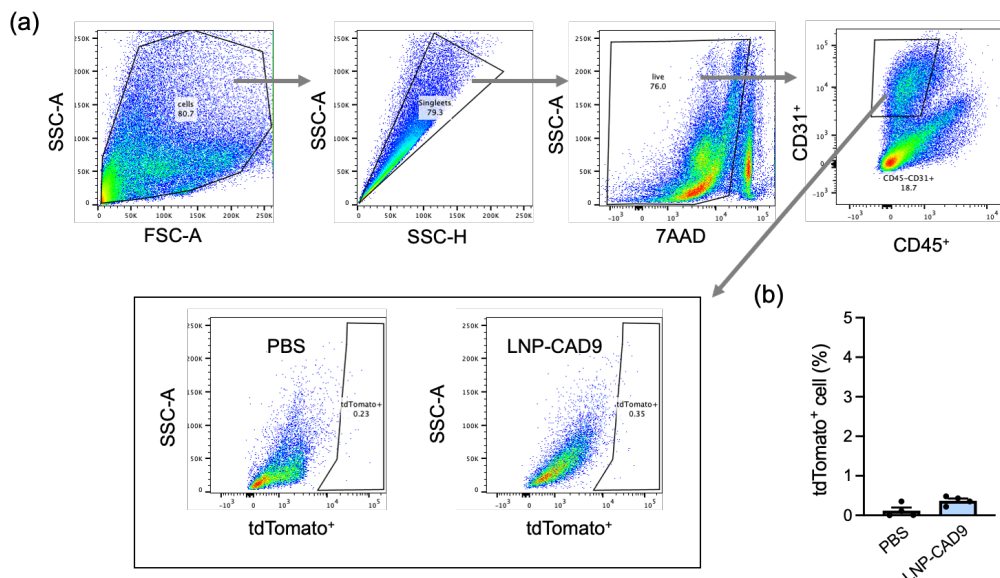

Supplementary Figure 27. (a) Representative gating strategy for tdTomato<sup>+</sup> endothelial cells in the heart. 7AAD was used to distinguish live and dead cells. CD45<sup>+</sup> antibody was used to stain immune cells, then CD45/CD31<sup>+</sup> was used to identify heart endothelial cells. Ai14 mice was administered with PBS or LNP-CAD9 delivering Cre mRNA at a total dosage of 0.3 mg kg<sup>-1</sup>. The mice were necropsied 3 days post-injection for flow cytometry studies. (b) Proportion of tdTomato<sup>+</sup> endothelial cells in the heart assessed by flow cytometry. Data are presented as  $\pm$  s.e.m. (n = 4 mice). Source Data are provided in the Source Data File.

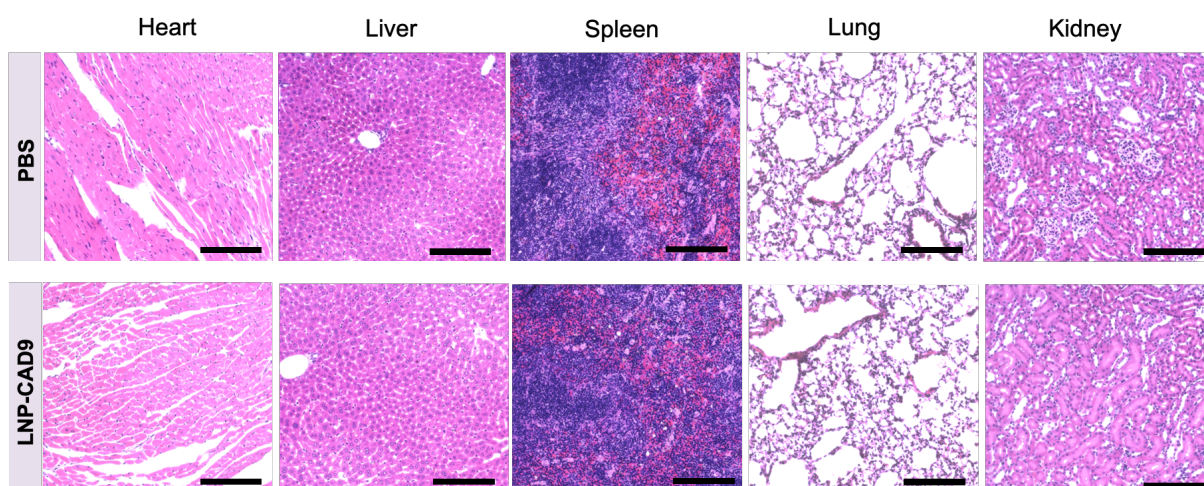

Supplementary Figure 28. Tissue section histology of PBS and LNP-CAD9 treated samples. Mice were administered intravenously at mRNA dosage of 1.0 mg/kg, and PBS treated group was used as the negative control. Tissue sections of heart, liver, spleen, lung, and kidney were acquired 12 h post-injection and prepared for H&E staining. Scale bar = 150  $\mu$ m.

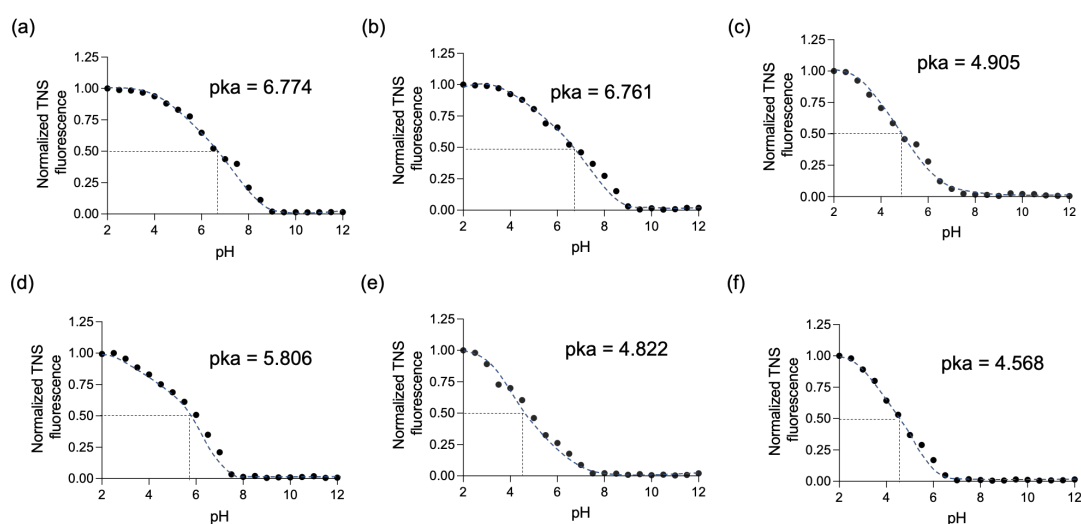

Supplementary Figure 29. Representative TNS assay curves for determining the apparent pKa of LNP-CAD20 (a), LNP-CAD95 (b), LNP-CAD10 (c), LNP-CAD3 (d), LNP-CAD14 (e) and LNP-CAD73 (f). Apparent pKa was defined as the point at which 50% of maximum TNS fluorescence was achieved. Source Data are provided in the Source Data File.

Supplementary Table 1. Particle size, PDI, zeta potential, and encapsulation efficiency (EE) of CAD1-48 based barcode LNPs and its respective CAD lipid information.

| Barcode LNP No. | Lipid name             | Diameter (nm) | PDI         | Zeta potential (mV) | EE (%)     | Barcode LNP No. | Lipid name             | Diameter (nm) | PDI         | Zeta potential (mV) | EE (%)     |
|-----------------|------------------------|---------------|-------------|---------------------|------------|-----------------|------------------------|---------------|-------------|---------------------|------------|
| LNP-CAD1        | 1-A <sub>2</sub> -6b   | 213.2 ± 3.9   | 0.40 ± 0.06 | 1.6 ± 0.8           | 52.8 ± 2.4 | LNP-CAD25       | 1-A <sub>2</sub> -9b   | 164.2 ± 5.8   | 0.18 ± 0.08 | -1.6 ± 4.4          | 48.1 ± 0.5 |
| LNP-CAD2        | 2-A <sub>2</sub> -6b   | 221.9 ± 16.5  | 0.35 ± 0.03 | 4.2 ± 1.5           | 69.7 ± 1.8 | LNP-CAD26       | 2-A <sub>2</sub> -9b   | 186.2 ± 4.3   | 0.26 ± 0.08 | 5.8 ± 3.9           | 66.2 ± 3.8 |
| LNP-CAD3        | 3-A <sub>2</sub> -6b   | 185.3 ± 9.6   | 0.29 ± 0.05 | 6.2 ± 0.6           | 57.4 ± 2.5 | LNP-CAD27       | 3-A <sub>2</sub> -9b   | 169.9 ± 2.8   | 0.20 ± 0.07 | -8.8 ± 2.6          | 54.9 ± 4.0 |
| LNP-CAD4        | 4-A <sub>2</sub> -6b   | 205.6 ± 1.9   | 0.29 ± 0.03 | 7.1 ± 0.9           | 63.0 ± 2.6 | LNP-CAD28       | 4-A <sub>2</sub> -9b   | 172.1 ± 5.1   | 0.23 ± 0.07 | 5.2 ± 1.6           | 50.9 ± 1.3 |
| LNP-CAD5        | 11-A <sub>2</sub> -6b  | 219.7 ± 6.2   | 0.34 ± 0.05 | -5.4 ± 0.4          | 51.5 ± 1.5 | LNP-CAD29       | 11-A <sub>2</sub> -9b  | 153.1 ± 7.8   | 0.18 ± 0.03 | 2.9 ± 2.3           | 48.7 ± 1.4 |
| LNP-CAD6        | 12-A <sub>2</sub> -6b  | 214.6 ± 3.9   | 0.31 ± 0.06 | 6.6 ± 0.5           | 76.9 ± 1.7 | LNP-CAD30       | 12-A <sub>2</sub> -9b  | 135.1 ± 5.9   | 0.14 ± 0.04 | 9.2 ± 3.1           | 69.4 ± 1.6 |
| LNP-CAD7        | 1-A <sub>2</sub> -7b   | 182.5 ± 2.8   | 0.25 ± 0.09 | -6.2 ± 0.6          | 73.4 ± 2.2 | LNP-CAD31       | 1-A <sub>2</sub> -9b2  | 167.1 ± 7.0   | 0.23 ± 0.05 | 12.7 ± 2.8          | 54.9 ± 2.6 |
| LNP-CAD8        | 2-A <sub>2</sub> -7b   | 217.0 ± 2.7   | 0.41 ± 0.07 | 0.1 ± 0.4           | 77.6 ± 1.9 | LNP-CAD32       | 2-A <sub>2</sub> -9b2  | 164.2 ± 7.6   | 0.19 ± 0.05 | -6.4 ± 2.9          | 73.2 ± 4.3 |
| LNP-CAD9        | 3-A <sub>2</sub> -7b   | 150.1 ± 2.9   | 0.21 ± 0.01 | 4.5 ± 0.3           | 71.6 ± 2.1 | LNP-CAD33       | 3-A <sub>2</sub> -9b2  | 157.1 ± 5.7   | 0.17 ± 0.03 | -10.7 ± 3.3         | 53.1 ± 1.5 |
| LNP-CAD10       | 4-A <sub>2</sub> -7b   | 214.9 ± 2.0   | 0.40 ± 0.03 | 1.1 ± 9.0           | 78.3 ± 2.2 | LNP-CAD34       | 4-A <sub>2</sub> -9b2  | 171.9 ± 4.0   | 0.10 ± 0.05 | 14.7 ± 1.7          | 64.1 ± 2.1 |
| LNP-CAD11       | 11-A <sub>2</sub> -7b  | 145.8 ± 2.8   | 0.15 ± 0.06 | -1.6 ± 2.7          | 73.0 ± 2.6 | LNP-CAD35       | 11-A <sub>2</sub> -9b2 | 166.8 ± 5.2   | 0.18 ± 0.05 | 10.4 ± 1.5          | 57.3 ± 2.4 |
| LNP-CAD12       | 12-A <sub>2</sub> -7b  | 143.6 ± 6.9   | 0.22 ± 0.04 | -0.4 ± 0.6          | 74.5 ± 1.9 | LNP-CAD36       | 12-A <sub>2</sub> -9b2 | 160.8 ± 7.6   | 0.16 ± 0.06 | -4.3 ± 5.2          | 58.4 ± 1.5 |
| LNP-CAD13       | 1-A <sub>2</sub> -7b2  | 210.3 ± 9.8   | 0.21 ± 0.05 | -1.3 ± 0.8          | 54.4 ± 4.4 | LNP-CAD37       | 1-A <sub>2</sub> -6b   | 150.3 ± 3.8   | 0.19 ± 0.06 | -9.6 ± 4.7          | 39.2 ± 1.8 |
| LNP-CAD14       | 2-A <sub>2</sub> -7b2  | 182.5 ± 8.7   | 0.24 ± 0.06 | -3.0 ± 0.9          | 59.8 ± 2.9 | LNP-CAD38       | 2-A <sub>2</sub> -6b   | 154.9 ± 5.6   | 0.13 ± 0.05 | 1.2 ± 3.7           | 42.5 ± 1.5 |
| LNP-CAD15       | 3-A <sub>2</sub> -7b2  | 206.3 ± 6.5   | 0.31 ± 0.05 | 1.9 ± 0.2           | 51.3 ± 1.4 | LNP-CAD39       | 3-A <sub>2</sub> -6b   | 159.3 ± 5.2   | 0.14 ± 0.07 | 12.6 ± 3.9          | 48.8 ± 2.4 |
| LNP-CAD16       | 4-A <sub>2</sub> -7b2  | 221.1 ± 6.7   | 0.25 ± 0.07 | -8.4 ± 4.8          | 75.1 ± 1.4 | LNP-CAD40       | 4-A <sub>2</sub> -6b   | 151.4 ± 5.4   | 0.22 ± 0.07 | 6.9 ± 2.5           | 49.6 ± 3.8 |
| LNP-CAD17       | 11-A <sub>2</sub> -7b2 | 212.3 ± 3.6   | 0.27 ± 0.04 | -0.7 ± 1.6          | 54.8 ± 2.3 | LNP-CAD41       | 11-A <sub>2</sub> -6b  | 135.4 ± 7.5   | 0.12 ± 0.05 | 9.2 ± 1.5           | 46.8 ± 5.1 |
| LNP-CAD18       | 12-A <sub>2</sub> -7b2 | 173.2 ± 4.4   | 0.21 ± 0.06 | 4.3 ± 0.4           | 85.6 ± 2.9 | LNP-CAD42       | 12-A <sub>2</sub> -6b  | 156.2 ± 9.1   | 0.16 ± 0.08 | -3.6 ± 1.9          | 37.0 ± 3.8 |
| LNP-CAD19       | 1-A <sub>2</sub> -8b   | 136.4 ± 4.9   | 0.23 ± 0.06 | 2.8 ± 1.4           | 84.3 ± 3.1 | LNP-CAD43       | 1-A <sub>2</sub> -7b   | 158.1 ± 10.2  | 0.15 ± 0.07 | 6.7 ± 4.0           | 53.4 ± 3.2 |
| LNP-CAD20       | 2-A <sub>2</sub> -8b   | 138.3 ± 6.9   | 0.21 ± 0.12 | -0.8 ± 0.6          | 75.1 ± 1.3 | LNP-CAD44       | 2-A <sub>2</sub> -7b   | 176.0 ± 5.6   | 0.16 ± 0.04 | 7.4 ± 1.6           | 77.9 ± 3.2 |
| LNP-CAD21       | 3-A <sub>2</sub> -8b   | 116.2 ± 7.6   | 0.27 ± 0.09 | -3.6 ± 3.2          | 85.7 ± 2.3 | LNP-CAD45       | 3-A <sub>2</sub> -7b   | 167.4 ± 5.1   | 0.16 ± 0.02 | 8.9 ± 9.2           | 60.2 ± 2.8 |
| LNP-CAD22       | 4-A <sub>2</sub> -8b   | 110.5 ± 9.9   | 0.22 ± 0.08 | 2.6 ± 1.4           | 77.3 ± 2.3 | LNP-CAD46       | 4-A <sub>2</sub> -7b   | 159.8 ± 2.2   | 0.10 ± 0.04 | 2.4 ± 0.6           | 66.7 ± 4.0 |
| LNP-CAD23       | 11-A <sub>2</sub> -8b  | 149.1 ± 4.7   | 0.25 ± 0.08 | -0.1 ± 1.9          | 71.9 ± 2.4 | LNP-CAD47       | 11-A <sub>2</sub> -7b  | 143.2 ± 5.3   | 0.14 ± 0.09 | 7.0 ± 1.7           | 45.5 ± 4.4 |
| LNP-CAD24       | 12-A <sub>2</sub> -8b  | 151.5 ± 4.6   | 0.23 ± 0.07 | 3.1 ± 0.6           | 87.1 ± 2.7 | LNP-CAD48       | 12-A <sub>2</sub> -7b  | 174.6 ± 6.1   | 0.14 ± 0.03 | 8.8 ± 2.3           | 63.3 ± 3.6 |

Supplementary Table 2. Particle size, PDI, zeta potential, and encapsulation efficiency (EE) of CAD49-96 based barcode LNPs and its respective CAD lipid information.

| Barcode LNP No. | Lipid name             | Diameter (nm) | PDI         | Zeta potential (mV) | EE (%)     | Barcode LNP No. | Lipid name             | Diameter (nm) | PDI         | Zeta potential (mV) | EE (%)     |
|-----------------|------------------------|---------------|-------------|---------------------|------------|-----------------|------------------------|---------------|-------------|---------------------|------------|
| LNP-CAD49       | 1-A <sub>2</sub> -7b2  | 175.2 ± 3.0   | 0.26 ± 0.10 | 1.4 ± 2.5           | 78.5 ± 4.1 | LNP-CAD73       | 1-A <sub>2</sub> -6    | 203.4 ± 4.9   | 0.18 ± 0.09 | 3.8 ± 1.4           | 85.2 ± 4.9 |
| LNP-CAD50       | 2-A <sub>2</sub> -7b2  | 163.1 ± 6.5   | 0.19 ± 0.05 | -7.2 ± 2.9          | 78.8 ± 2.7 | LNP-CAD74       | 5-A <sub>2</sub> -6b   | 174.0 ± 5.5   | 0.23 ± 0.05 | 7.9 ± 1.3           | 81.2 ± 2.7 |
| LNP-CAD51       | 3-A <sub>2</sub> -7b2  | 162.2 ± 2.7   | 0.23 ± 0.06 | 6.2 ± 1.6           | 79.3 ± 1.7 | LNP-CAD75       | 9-A <sub>2</sub> -6b   | 164.2 ± 5.7   | 0.13 ± 0.09 | 6.5 ± 0.9           | 85.1 ± 2.8 |
| LNP-CAD52       | 4-A <sub>2</sub> -7b2  | 159.9 ± 3.6   | 0.10 ± 0.06 | 5.2 ± 2.4           | 77.9 ± 6.2 | LNP-CAD76       | 6-A <sub>2</sub> -7    | 143.6 ± 8.7   | 0.09 ± 0.08 | 3.3 ± 3.8           | 85.3 ± 4.4 |
| LNP-CAD53       | 11-A <sub>2</sub> -7b2 | 162.3 ± 3.0   | 0.13 ± 0.02 | 6.4 ± 1.2           | 79.0 ± 3.7 | LNP-CAD77       | 8-A <sub>2</sub> -7b   | 195.5 ± 9.9   | 0.29 ± 0.07 | -9.7 ± 2.2          | 80.6 ± 2.9 |
| LNP-CAD54       | 12-A <sub>2</sub> -7b2 | 151.7 ± 4.9   | 0.21 ± 0.03 | -0.5 ± 1.3          | 79.4 ± 3.1 | LNP-CAD78       | 8-A <sub>2</sub> -7b2  | 179.2 ± 7.4   | 0.25 ± 0.09 | 5.8 ± 1.3           | 80.6 ± 3.1 |
| LNP-CAD55       | 1-A <sub>2</sub> -8b   | 155.1 ± 5.2   | 0.16 ± 0.03 | -8.2 ± 1.4          | 57.8 ± 2.7 | LNP-CAD79       | 5-A <sub>2</sub> -8b   | 181.7 ± 4.9   | 0.24 ± 0.05 | 1.4 ± 0.6           | 83.1 ± 3.0 |
| LNP-CAD56       | 2-A <sub>2</sub> -8b   | 151.7 ± 3.2   | 0.25 ± 0.08 | 1.4 ± 0.9           | 63.9 ± 3.4 | LNP-CAD80       | 6-A <sub>2</sub> -8b   | 141.6 ± 11.1  | 0.21 ± 0.04 | 3.9 ± 2.1           | 82.4 ± 3.3 |
| LNP-CAD57       | 3-A <sub>2</sub> -8b   | 162.3 ± 2.6   | 0.25 ± 0.10 | 4.7 ± 1.7           | 41.8 ± 2.2 | LNP-CAD81       | 7-A <sub>2</sub> -8b   | 171.4 ± 4.5   | 0.16 ± 0.04 | 6.7 ± 2.0           | 78.5 ± 4.5 |
| LNP-CAD58       | 4-A <sub>2</sub> -8b   | 140.8 ± 4.5   | 0.16 ± 0.07 | 8.6 ± 0.9           | 40.6 ± 3.4 | LNP-CAD82       | 8-A <sub>2</sub> -8b   | 155.0 ± 6.5   | 0.15 ± 0.05 | 1.5 ± 0.7           | 79.7 ± 3.5 |
| LNP-CAD59       | 11-A <sub>2</sub> -8b  | 173.5 ± 5.8   | 0.20 ± 0.05 | -5.6 ± 6.3          | 57.6 ± 3.0 | LNP-CAD83       | 9-A <sub>2</sub> -8b   | 156.3 ± 5.1   | 0.26 ± 0.11 | 6.3 ± 0.9           | 82.4 ± 3.3 |
| LNP-CAD60       | 12-A <sub>2</sub> -8b  | 146.7 ± 6.5   | 0.25 ± 0.06 | 5.1 ± 2.7           | 59.2 ± 2.9 | LNP-CAD84       | 10-A <sub>2</sub> -8b  | 190.5 ± 4.3   | 0.30 ± 0.12 | 4.3 ± 3.7           | 83.4 ± 3.1 |
| LNP-CAD61       | 1-A <sub>2</sub> -9b2  | 161.7 ± 6.8   | 0.22 ± 0.06 | 7.9 ± 1.9           | 46.9 ± 2.5 | LNP-CAD85       | 9-A <sub>2</sub> -9    | 191.3 ± 3.4   | 0.16 ± 0.10 | 4.8 ± 2.2           | 84.4 ± 3.6 |
| LNP-CAD62       | 2-A <sub>2</sub> -9b2  | 168.9 ± 3.1   | 0.18 ± 0.02 | -2.4 ± 0.9          | 65.6 ± 3.0 | LNP-CAD86       | 6-A <sub>2</sub> -6b   | 190.4 ± 4.1   | 0.23 ± 0.08 | -1.8 ± 0.8          | 84.2 ± 2.9 |
| LNP-CAD63       | 3-A <sub>2</sub> -9b2  | 169.2 ± 5.5   | 0.22 ± 0.07 | 2.6 ± 1.8           | 54.3 ± 2.9 | LNP-CAD87       | 10-A <sub>2</sub> -6b  | 204.3 ± 5.3   | 0.16 ± 0.07 | -6.4 ± 0.6          | 81.8 ± 4.7 |
| LNP-CAD64       | 4-A <sub>2</sub> -9b2  | 184.3 ± 6.4   | 0.12 ± 0.04 | 5.8 ± 3.4           | 48.0 ± 2.7 | LNP-CAD88       | 7-A <sub>2</sub> -7b   | 169.6 ± 4.5   | 0.19 ± 0.12 | 12.8 ± 0.7          | 86.8 ± 1.9 |
| LNP-CAD65       | 11-A <sub>2</sub> -9b2 | 173.9 ± 5.3   | 0.12 ± 0.03 | -0.9 ± 1.2          | 47.1 ± 5.7 | LNP-CAD89       | 9-A <sub>2</sub> -7b   | 201.5 ± 4.4   | 0.24 ± 0.06 | 2.3 ± 0.9           | 82.4 ± 3.3 |
| LNP-CAD66       | 12-A <sub>2</sub> -9b2 | 154.3 ± 4.8   | 0.13 ± 0.07 | 8.7 ± 1.4           | 37.2 ± 3.6 | LNP-CAD90       | 6-A <sub>2</sub> -7b2  | 162.3 ± 4.1   | 0.22 ± 0.06 | -1.7 ± 0.6          | 83.2 ± 4.1 |
| LNP-CAD67       | 1-A <sub>2</sub> -7    | 192.2 ± 5.1   | 0.08 ± 0.05 | -1.2 ± 0.8          | 77.8 ± 3.5 | LNP-CAD91       | 8-A <sub>2</sub> -7b2  | 143.2 ± 6.9   | 0.27 ± 0.11 | 1.5 ± 2.6           | 75.9 ± 5.4 |
| LNP-CAD68       | 2-A <sub>2</sub> -7    | 178.9 ± 3.7   | 0.18 ± 0.04 | 1.4 ± 1.9           | 84.0 ± 6.1 | LNP-CAD92       | 5-A <sub>2</sub> -8b   | 126.7 ± 5.9   | 0.21 ± 0.09 | -1.2 ± 2.7          | 85.5 ± 4.5 |
| LNP-CAD69       | 3-A <sub>2</sub> -7    | 193.7 ± 5.0   | 0.07 ± 0.05 | 4.4 ± 4.0           | 74.6 ± 3.5 | LNP-CAD93       | 7-A <sub>2</sub> -8b   | 113.9 ± 5.0   | 0.13 ± 0.05 | -3.1 ± 2.1          | 73.8 ± 4.0 |
| LNP-CAD70       | 4-A <sub>2</sub> -7    | 181.2 ± 3.9   | 0.10 ± 0.05 | 1.5 ± 7.5           | 82.2 ± 4.3 | LNP-CAD94       | 5-A <sub>2</sub> -9b2  | 115.4 ± 7.1   | 0.16 ± 0.08 | 6.7 ± 4.5           | 75.1 ± 2.6 |
| LNP-CAD71       | 11-A <sub>2</sub> -7   | 195.1 ± 6.3   | 0.12 ± 0.04 | 8.6 ± 15.5          | 81.0 ± 4.8 | LNP-CAD95       | 7-A <sub>2</sub> -9b2  | 109.2 ± 5.2   | 0.25 ± 0.05 | -3.0 ± 4.1          | 80.4 ± 4.3 |
| LNP-CAD72       | 12-A <sub>2</sub> -7   | 181.8 ± 4.8   | 0.11 ± 0.09 | 13.2 ± 0.4          | 79.8 ± 5.1 | LNP-CAD96       | 10-A <sub>2</sub> -9b2 | 114.1 ± 6.7   | 0.16 ± 0.04 | 2.1 ± 1.6           | 84.9 ± 4.8 |

Supplementary Table 3. Library of full-length reverse primer sequences. Primer sequences differ in the eight-nucleotide organ barcode sequence.

| Number | i7       | Sequence                                                            |
|--------|----------|---------------------------------------------------------------------|
| 1      | CTACCAGG | CAAGCAGAAGACGGCATAACGAGATCCTGGTAGGTGACTGGAGTTCAGACGTGTGCTCTCCGATCT  |
| 2      | CATGCTTA | CAAGCAGAAGACGGCATAACGAGATTAAGCATGGTACTGGAGTTCAGACGTGTGCTCTCCGATCT   |
| 3      | GCACATCT | CAAGCAGAAGACGGCATAACGAGATAGATGTGCGTGACTGGAGTTCAGACGTGTGCTCTCCGATCT  |
| 4      | TGCTCGAC | CAAGCAGAAGACGGCATAACGAGATGTCGAGCAGTGACTGGAGTTCAGACGTGTGCTCTCCGATCT  |
| 5      | AGCAATTC | CAAGCAGAAGACGGCATAACGAGATGAATTGCTGTGACTGGAGTTCAGACGTGTGCTCTCCGATCT  |
| 6      | AGTTGCTT | CAAGCAGAAGACGGCATAACGAGATAAGCAACTGTGACTGGAGTTCAGACGTGTGCTCTCCGATCT  |
| 7      | CCAGTTAG | CAAGCAGAAGACGGCATAACGAGATCTAACTGGGTGACTGGAGTTCAGACGTGTGCTCTCCGATCT  |
| 8      | TTGAGCCT | CAAGCAGAAGACGGCATAACGAGATAGGCTCAAGTGACTGGAGTTCAGACGTGTGCTCTCCGATCT  |
| 9      | ACCAACTG | CAAGCAGAAGACGGCATAACGAGATCAGTTGGTGTGACTGGAGTTCAGACGTGTGCTCTCCGATCT  |
| 10     | GGTCCAGA | CAAGCAGAAGACGGCATAACGAGATTCTGGACCGTGACTGGAGTTCAGACGTGTGCTCTCCGATCT  |
| 11     | GTATAACA | CAAGCAGAAGACGGCATAACGAGATTGTTATACGTGACTGGAGTTCAGACGTGTGCTCTCCGATCT  |
| 12     | TTCGCTGA | CAAGCAGAAGACGGCATAACGAGATTCAGCGAAGTGACTGGAGTTCAGACGTGTGCTCTCCGATCT  |
| 13     | AACTTGAC | CAAGCAGAAGACGGCATAACGAGATGTCAAGTTGTGACTGGAGTTCAGACGTGTGCTCTCCGATCT  |
| 14     | CACATCCT | CAAGCAGAAGACGGCATAACGAGATAGGATGTGGTACTGGAGTTCAGACGTGTGCTCTCCGATCT   |
| 15     | TCGGAATG | CAAGCAGAAGACGGCATAACGAGATCAATCCGAGTGACTGGAGTTCAGACGTGTGCTCTCCGATCT  |
| 16     | AAGGATGT | CAAGCAGAAGACGGCATAACGAGATACATCCTTGTGACTGGAGTTCAGACGTGTGCTCTCCGATCT  |
| 17     | GCACACGA | CAAGCAGAAGACGGCATAACGAGATTCGTGTGCGTGACTGGAGTTCAGACGTGTGCTCTCCGATCT  |
| 18     | TCTGGCGA | CAAGCAGAAGACGGCATAACGAGATTCGCCAGAGTGACTGGAGTTCAGACGTGTGCTCTCCGATCT  |
| 19     | CATAGCGA | CAAGCAGAAGACGGCATAACGAGATTCGCTATGGTACTGGAGTTCAGACGTGTGCTCTCCGATCT   |
| 20     | CAGGAGCC | CAAGCAGAAGACGGCATAACGAGATGGCTCCTGGTACTGGAGTTCAGACGTGTGCTCTCCGATCT   |
| 21     | TGTCGGAT | CAAGCAGAAGACGGCATAACGAGATATCCGACAGTGACTGGAGTTCAGACGTGTGCTCTCCGATCT  |
| 22     | ATTATGTT | CAAGCAGAAGACGGCATAACGAGATAACAATAATGTGACTGGAGTTCAGACGTGTGCTCTCCGATCT |
| 23     | CCTACCAT | CAAGCAGAAGACGGCATAACGAGATATGGTAGGGTACTGGAGTTCAGACGTGTGCTCTCCGATCT   |
| 24     | TACTTAGC | CAAGCAGAAGACGGCATAACGAGATGCTAAGTAGTGACTGGAGTTCAGACGTGTGCTCTCCGATCT  |
| 25     | GAAGAAGT | CAAGCAGAAGACGGCATAACGAGATACTTCTTCGTGACTGGAGTTCAGACGTGTGCTCTCCGATCT  |
| 26     | AGGATCTA | CAAGCAGAAGACGGCATAACGAGATTAAGATCCTGTGACTGGAGTTCAGACGTGTGCTCTCCGATCT |
| 27     | GACAGTAA | CAAGCAGAAGACGGCATAACGAGATTTACTGTGCTGACTGGAGTTCAGACGTGTGCTCTCCGATCT  |
| 28     | CCTATGCC | CAAGCAGAAGACGGCATAACGAGATGGCATAGGGTACTGGAGTTCAGACGTGTGCTCTCCGATCT   |
| 29     | TCGCCTTG | CAAGCAGAAGACGGCATAACGAGATCAAGCGAGTGACTGGAGTTCAGACGTGTGCTCTCCGATCT   |
| 30     | ATAGCGTC | CAAGCAGAAGACGGCATAACGAGATGACGCTATGTGACTGGAGTTCAGACGTGTGCTCTCCGATCT  |
