# Supplementary material for: High-throughput barcoding of nanoparticles identifies cationic, degradable lipid-like materials for mRNA delivery to the lungs in female preclinical models
Source: PubMed Central journal article supplement (PMC10904786; doi:10.1038/s41467-024-45422-9), 2024-02-29
Supplement: 41467_2024_45422_MOESM3_ESM.pdf [file 41467_2024_45422_MOESM3_ESM.pdf]

## Description of Additional Supplementary Files

### **Supplementary Data Legends**

**Supplementary Data 1:** Enrichment analysis for Figure 3e.

**Supplementary Data 2:** Library of b-DNA sequences. NNNNNNNNNN represents a unique molecular identifier (UMI). \*denotes phosphorothioate modifications.

**Supplementary Data 3:** LC-MS spectrum of A2-6.

**Supplementary Data 4:** LC-MS spectrum of A2-6b.

**Supplementary Data 5:** LC-MS spectrum of A2-7.

**Supplementary Data 6:** LC-MS spectrum of A2-7b.

**Supplementary Data 7:** LC-MS spectrum of A2-7b2.

**Supplementary Data 8:** LC-MS spectrum of A2-8.

**Supplementary Data 9:** LC-MS spectrum of A2-8b.

**Supplementary Data 10:** LC-MS spectrum of A2-9.

**Supplementary Data 11:** LC-MS spectrum of A2-9b.

**Supplementary Data 12:** LC-MS spectrum of A2-9b2.

**Supplementary Data 13:** LC-MS spectrum of 5-A2-7b2.
